# Supplementary material for: Antithrombotic Therapy Increases the Risk of Bleeding after Endoscopic Submucosal Dissection for Early Gastric Cancer: A Propensity Score-Matched Analysis
Source: MDPI journal article supplement (doi:10.3390/cancers15102844), 2023-05-19
Supplement: s1 [file s1]

**Table S1.** Logistic regression analysis for bleeding after endoscopic submucosal dissection in total patients.

| Variables                       | Total patients (n = 4475) |                        |         |                      |         |
|---------------------------------|---------------------------|------------------------|---------|----------------------|---------|
|                                 | Bleeding / Total (%)      | Unadjusted OR (95% CI) | P value | Adjusted OR (95% CI) | P value |
| ATA                             |                           |                        |         |                      |         |
| No                              | 178/4105 (4.3)            | Ref                    |         | Ref                  |         |
| Yes                             | 33/370 (8.9)              | 2.16 (1.47, 3.18)      | < 0.001 | 1.62 (1.01, 2.60)    | 0.048   |
| Age (years)                     | 211/4475 (4.7)            | 0.99 (0.98, 1.01)      | 0.255   |                      |         |
| Sex (males)                     | 168/3451 (4.9)            | 1.17 (0.83, 1.64)      | 0.376   |                      |         |
| Platelet (x10 <sup>3</sup> /μL) | 211/4475 (4.7)            | 1 (1, 1)               | 0.358   |                      |         |
| PT INR                          | 211/4475 (4.7)            | 0.83 (0.13, 5.27)      | 0.844   |                      |         |
| APTT (sec)                      | 211/4475 (4.7)            | 1.04 (1.02, 1.07)      | 0.002   | 1.04 (1.01, 1.06)    | 0.005   |
| BUN (mg/dL)                     | 211/4475 (4.7)            | 1.01 (0.98, 1.03)      | 0.640   |                      |         |
| CKD (present)                   | 14/189 (7.4)              | 1.66 (0.95, 2.92)      | 0.077   | 1.36 (0.76, 2.45)    | 0.306   |
| Dialysis (yes)                  | 1/12 (8.3)                | 1.84 (0.24, 14.3)      | 0.560   |                      |         |
| DM (present)                    | 30/699 (4.3)              | 0.89 (0.60, 1.32)      | 0.566   |                      |         |
| HTN (present)                   | 77/1431 (5.4)             | 1.24 (0.93, 1.65)      | 0.150   |                      |         |
| CAD (present)                   | 14/154 (9.1)              | 2.09 (1.19, 3.69)      | 0.011   | 1.45 (0.76, 2.77)    | 0.264   |
| CVA (present)                   | 11/119 (9.2)              | 2.12 (1.12, 4.00)      | 0.021   | 1.42 (0.71, 2.83)    | 0.320   |
| LC (present)                    | 3/44 (6.82)               | 1.49 (0.48, 4.84)      | 0.511   |                      |         |
| Specimen size (cm)              | 211/4475 (4.7)            | 1.22 (1.10, 1.35)      | < 0.001 | 1.21 (1.09, 1.35)    | < 0.001 |
| Shape                           |                           |                        |         |                      |         |
| Elevated                        | 92/2310 (4.0)             | Ref                    |         | Ref                  |         |
| Flat/depressed                  | 119/2165 (5.5)            | 1.4 (1.06, 1.85)       | 0.017   | 1.46 (1.10, 1.93)    | 0.009   |
| Location                        |                           |                        |         |                      |         |
| Lower third                     | 119/2796 (4.3)            | Ref                    |         | Ref                  |         |
| Middle third                    | 78/1308 (6.0)             | 1.43 (1.06, 1.91)      | 0.018   | 1.36 (1.01, 1.82)    | 0.045   |
| Upper third                     | 14/371 (3.8)              | 0.88 (0.50, 1.55)      | 0.664   | 0.91 (0.52, 1.61)    | 0.753   |

OR, odds ratio; CI, confidence interval; ATA, antithrombotic agent; SMD, standardized mean difference; PT INR, prothrombin time international normalized ratio; APTT, activated partial thromboplastin time; BUN, blood urea nitrogen; CKD, chronic kidney disease; DM, diabetes mellitus; HTN, hypertension; CAD, coronary artery disease; CVA, cerebrovascular accidents; LC, liver cirrhosis. .
